# Supplementary material
Source: ML conference proceedings conference paper supplement (https://openreview.net/forum?id=o2tx_m7hK3t)
Supplement: supplementary_material [file attachment]

## Sheet: Experiment_keys_rev2
index	data set	target column	missing data type	infill type	NArw	ratio 0	ratio 0.1	ratio 0.33	ratio 0.66	ratio 1
0	Boston Housing	numeric target	missingatrandom	stndrdinfill	FALSE	0	1	2	3	4
1	Boston Housing	numeric target	missingatrandom	adjinfill	FALSE	20	21	22	23	24
2	Boston Housing	numeric target	missingatrandom	modeinfill	FALSE	40	41	42	43	44
3	Boston Housing	numeric target	missingatrandom	MLinfill	FALSE	60	61	62	63	64
4	Boston Housing	numeric target	numeric	stndrdinfill	FALSE	5	6	7	8	9
5	Boston Housing	numeric target	numeric	adjinfill	FALSE	25	26	27	28	29
6	Boston Housing	numeric target	numeric	modeinfill	FALSE	45	46	47	48	49
7	Boston Housing	numeric target	numeric	MLinfill	FALSE	65	66	67	68	69
8	Boston Housing	categoric target	missingatrandom	stndrdinfill	FALSE	10	11	12	13	14
9	Boston Housing	categoric target	missingatrandom	adjinfill	FALSE	30	31	32	33	34
10	Boston Housing	categoric target	missingatrandom	modeinfill	FALSE	50	51	52	53	54
11	Boston Housing	categoric target	missingatrandom	MLinfill	FALSE	70	71	72	73	74
12	Boston Housing	categoric target	categoric	stndrdinfill	FALSE	15	16	17	18	19
13	Boston Housing	categoric target	categoric	adjinfill	FALSE	35	36	37	38	39
14	Boston Housing	categoric target	categoric	modeinfill	FALSE	55	56	57	58	59
15	Boston Housing	categoric target	categoric	MLinfill	FALSE	75	76	77	78	79
16	Allstate	numeric target	missingatrandom	stndrdinfill	FALSE	80	81	82	83	84
17	Allstate	numeric target	missingatrandom	adjinfill	FALSE	100	101	102	103	104
18	Allstate	numeric target	missingatrandom	modeinfill	FALSE	120	121	122	123	124
19	Allstate	numeric target	missingatrandom	MLinfill	FALSE	140	141	142	143	144
20	Allstate	numeric target	numeric	stndrdinfill	FALSE	85	86	87	88	89
21	Allstate	numeric target	numeric	adjinfill	FALSE	105	106	107	108	109
22	Allstate	numeric target	numeric	modeinfill	FALSE	125	126	127	128	129
23	Allstate	numeric target	numeric	MLinfill	FALSE	145	146	147	148	149
24	Allstate	categoric target	missingatrandom	stndrdinfill	FALSE	90	91	92	93	94
25	Allstate	categoric target	missingatrandom	adjinfill	FALSE	110	111	112	113	114
26	Allstate	categoric target	missingatrandom	modeinfill	FALSE	130	131	132	133	134
27	Allstate	categoric target	missingatrandom	MLinfill	FALSE	150	151	152	153	154
28	Allstate	categoric target	categoric	stndrdinfill	FALSE	95	96	97	98	99
29	Allstate	categoric target	categoric	adjinfill	FALSE	115	116	117	118	119
30	Allstate	categoric target	categoric	modeinfill	FALSE	135	136	137	138	139
31	Allstate	categoric target	categoric	MLinfill	FALSE	155	156	157	158	159
32	IEEE	numeric target	missingatrandom	stndrdinfill	FALSE	160	161	162	163	164
33	IEEE	numeric target	missingatrandom	adjinfill	FALSE	180	181	182	183	184
34	IEEE	numeric target	missingatrandom	modeinfill	FALSE	200	201	202	203	204
35	IEEE	numeric target	missingatrandom	MLinfill	FALSE	220	221	222	223	224
36	IEEE	numeric target	numeric	stndrdinfill	FALSE	165	166	167	168	169
37	IEEE	numeric target	numeric	adjinfill	FALSE	185	186	187	188	189
38	IEEE	numeric target	numeric	modeinfill	FALSE	205	206	207	208	209
39	IEEE	numeric target	numeric	MLinfill	FALSE	225	226	227	228	229
40	IEEE	categoric target	missingatrandom	stndrdinfill	FALSE	170	171	172	173	174
41	IEEE	categoric target	missingatrandom	adjinfill	FALSE	190	191	192	193	194
42	IEEE	categoric target	missingatrandom	modeinfill	FALSE	210	211	212	213	214
43	IEEE	categoric target	missingatrandom	MLinfill	FALSE	230	231	232	233	234
44	IEEE	categoric target	categoric	stndrdinfill	FALSE	175	176	177	178	179
45	IEEE	categoric target	categoric	adjinfill	FALSE	195	196	197	198	199
46	IEEE	categoric target	categoric	modeinfill	FALSE	215	216	217	218	219
47	IEEE	categoric target	categoric	MLinfill	FALSE	235	236	237	238	239
48	Boston Housing	numeric target	missingatrandom	stndrdinfill	TRUE	240	241	242	243	244
49	Boston Housing	numeric target	missingatrandom	adjinfill	TRUE	260	261	262	263	264
50	Boston Housing	numeric target	missingatrandom	modeinfill	TRUE	280	281	282	283	284
51	Boston Housing	numeric target	missingatrandom	MLinfill	TRUE	300	301	302	303	304
52	Boston Housing	numeric target	numeric	stndrdinfill	TRUE	245	246	247	248	249
53	Boston Housing	numeric target	numeric	adjinfill	TRUE	265	266	267	268	269
54	Boston Housing	numeric target	numeric	modeinfill	TRUE	285	286	287	288	289
55	Boston Housing	numeric target	numeric	MLinfill	TRUE	305	306	307	308	309
56	Boston Housing	categoric target	missingatrandom	stndrdinfill	TRUE	250	251	252	253	254
57	Boston Housing	categoric target	missingatrandom	adjinfill	TRUE	270	271	272	273	274
58	Boston Housing	categoric target	missingatrandom	modeinfill	TRUE	290	291	292	293	294
59	Boston Housing	categoric target	missingatrandom	MLinfill	TRUE	310	311	312	313	314
60	Boston Housing	categoric target	categoric	stndrdinfill	TRUE	255	256	257	258	259
61	Boston Housing	categoric target	categoric	adjinfill	TRUE	275	276	277	278	279
62	Boston Housing	categoric target	categoric	modeinfill	TRUE	295	296	297	298	299
63	Boston Housing	categoric target	categoric	MLinfill	TRUE	315	316	317	318	319
64	Allstate	numeric target	missingatrandom	stndrdinfill	TRUE	320	321	322	323	324
65	Allstate	numeric target	missingatrandom	adjinfill	TRUE	340	341	342	343	344
66	Allstate	numeric target	missingatrandom	modeinfill	TRUE	360	361	362	363	364
67	Allstate	numeric target	missingatrandom	MLinfill	TRUE	380	381	382	383	384
68	Allstate	numeric target	numeric	stndrdinfill	TRUE	325	326	327	328	329
69	Allstate	numeric target	numeric	adjinfill	TRUE	345	346	347	348	349
70	Allstate	numeric target	numeric	modeinfill	TRUE	365	366	367	368	369
71	Allstate	numeric target	numeric	MLinfill	TRUE	385	386	387	388	389
72	Allstate	categoric target	missingatrandom	stndrdinfill	TRUE	330	331	332	333	334
73	Allstate	categoric target	missingatrandom	adjinfill	TRUE	350	351	352	353	354
74	Allstate	categoric target	missingatrandom	modeinfill	TRUE	370	371	372	373	374
75	Allstate	categoric target	missingatrandom	MLinfill	TRUE	390	391	392	393	394
76	Allstate	categoric target	categoric	stndrdinfill	TRUE	335	336	337	338	339
77	Allstate	categoric target	categoric	adjinfill	TRUE	355	356	357	358	359
78	Allstate	categoric target	categoric	modeinfill	TRUE	375	376	377	378	379
79	Allstate	categoric target	categoric	MLinfill	TRUE	395	396	397	398	399
80	IEEE	numeric target	missingatrandom	stndrdinfill	TRUE	400	401	402	403	404
81	IEEE	numeric target	missingatrandom	adjinfill	TRUE	420	421	422	423	424
82	IEEE	numeric target	missingatrandom	modeinfill	TRUE	440	441	442	443	444
83	IEEE	numeric target	missingatrandom	MLinfill	TRUE	460	461	462	463	464
84	IEEE	numeric target	numeric	stndrdinfill	TRUE	405	406	407	408	409
85	IEEE	numeric target	numeric	adjinfill	TRUE	425	426	427	428	429
86	IEEE	numeric target	numeric	modeinfill	TRUE	445	446	447	448	449
87	IEEE	numeric target	numeric	MLinfill	TRUE	465	466	467	468	469
88	IEEE	categoric target	missingatrandom	stndrdinfill	TRUE	410	411	412	413	414
89	IEEE	categoric target	missingatrandom	adjinfill	TRUE	430	431	432	433	434
90	IEEE	categoric target	missingatrandom	modeinfill	TRUE	450	451	452	453	454
91	IEEE	categoric target	missingatrandom	MLinfill	TRUE	470	471	472	473	474
92	IEEE	categoric target	categoric	stndrdinfill	TRUE	415	416	417	418	419
93	IEEE	categoric target	categoric	adjinfill	TRUE	435	436	437	438	439
94	IEEE	categoric target	categoric	modeinfill	TRUE	455	456	457	458	459
95	IEEE	categoric target	categoric	MLinfill	TRUE	475	476	477	478	479
