# Supplementary material
Source: ML conference proceedings conference paper supplement (https://openreview.net/forum?id=o2tx_m7hK3t)
Supplement: supplementary_material [file attachment]

# Specification of Derivations with Automunge

This essay intended for advanced users

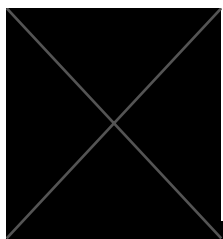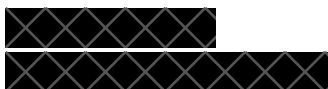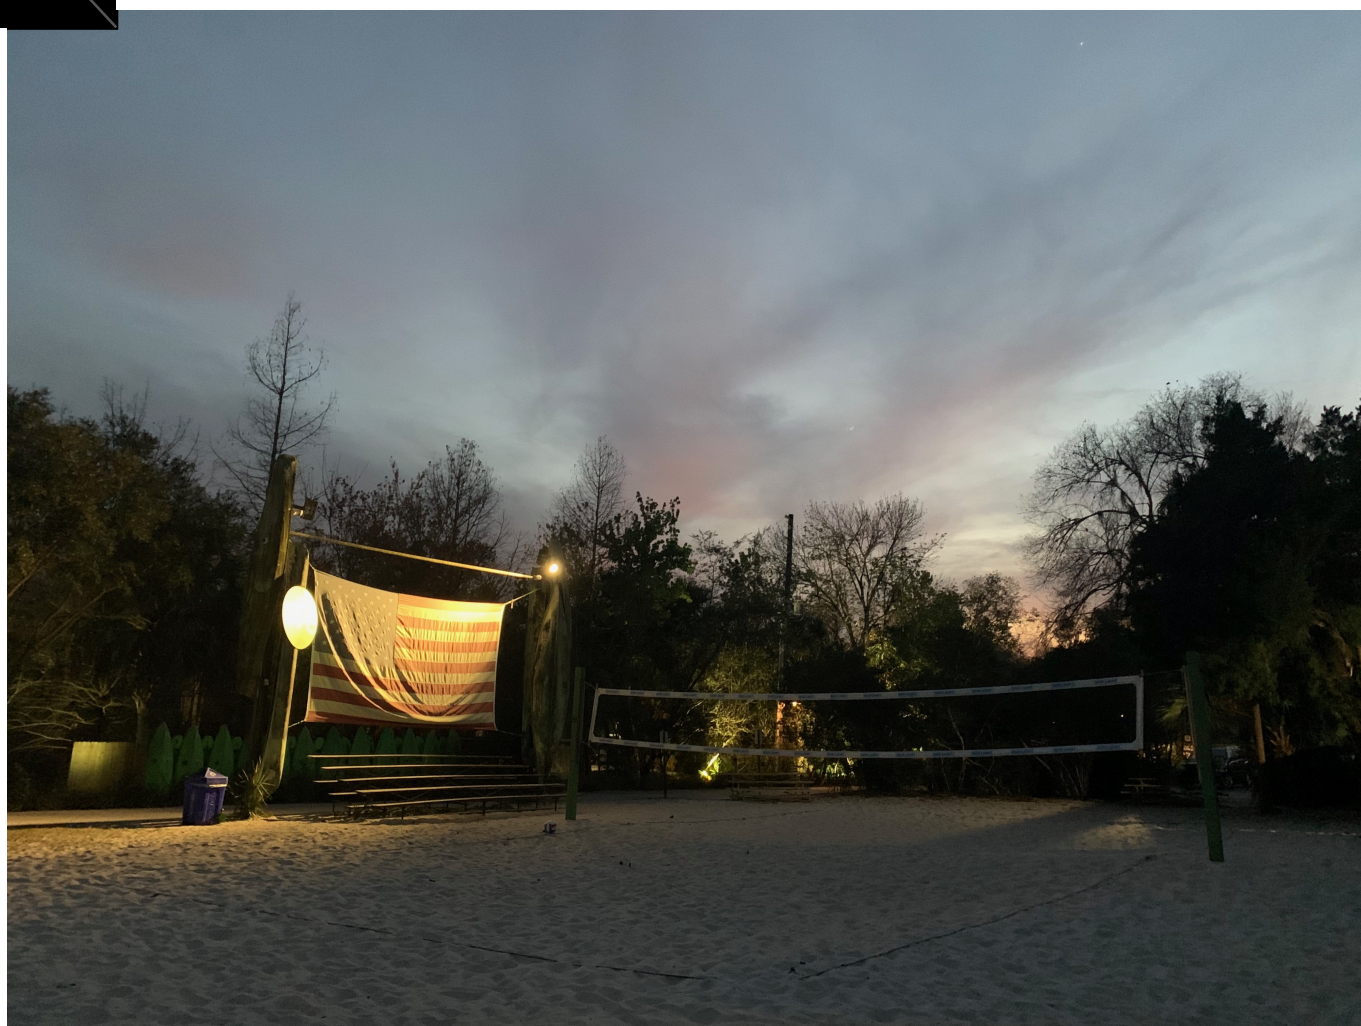

t's been a busy month here at Automunge. Given all of the uncertainty surrounding the

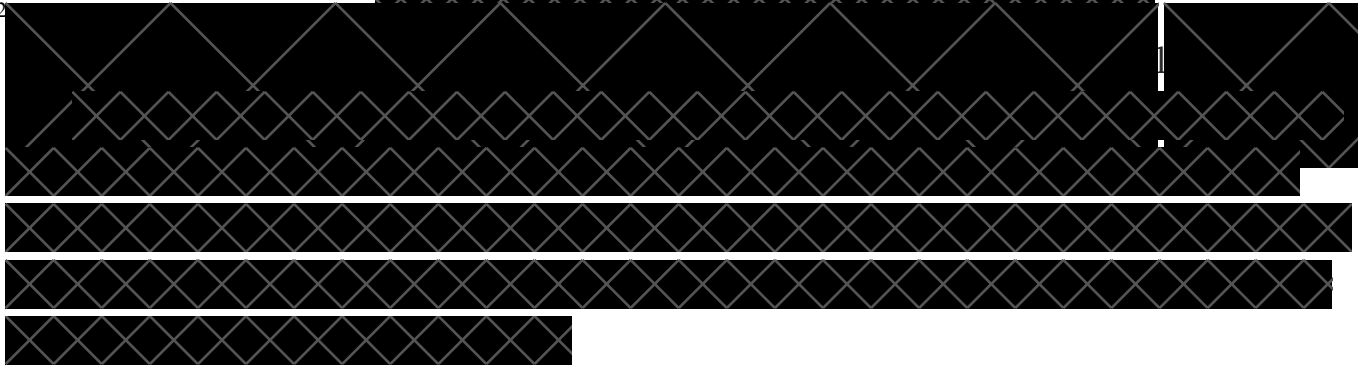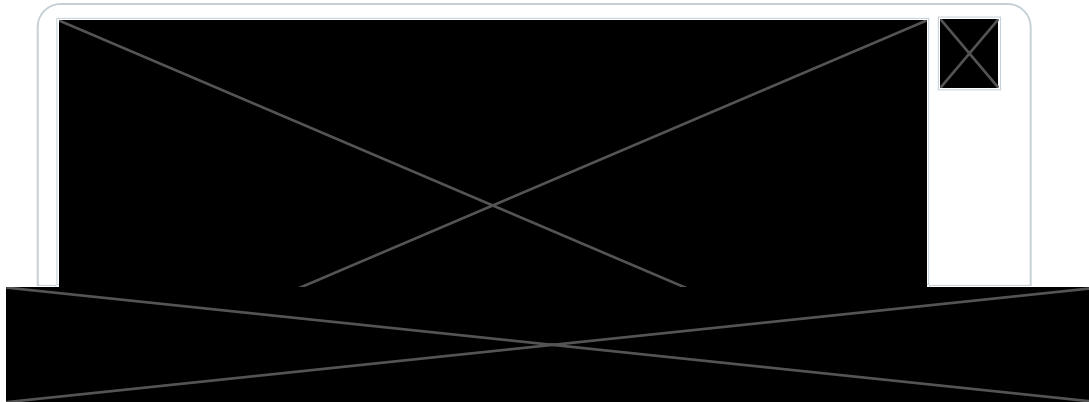

Today wanted to offer a brief write-up expanding on detail for defining family trees of transformations in the Automunge library. By family trees I am referring to composing sets of returned columns originating from a single source column which may include multiple generations and branches of derivations, which in Automunge may be specified with the “family tree” primitives. Generally speaking, each one of these transforms is performed based on some basis from an evaluation of a training set of tabular data in application of the `automunge(.)` function, and then that same basis may be used to consistently prepare additional data in application of the `postmunge(.)` function. Let’s look at a few simple derivations to start.

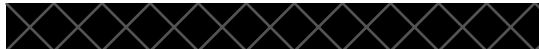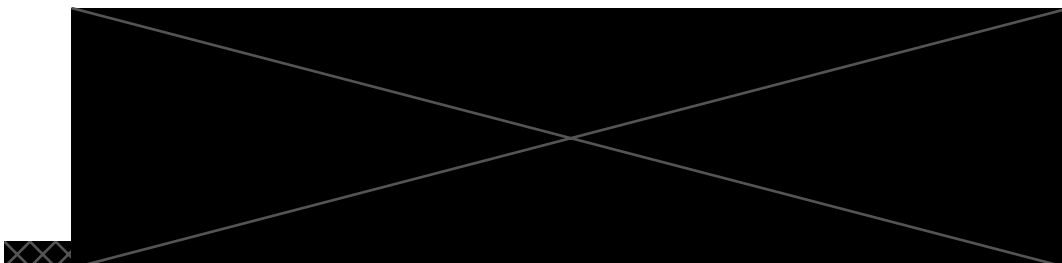

Root Category:

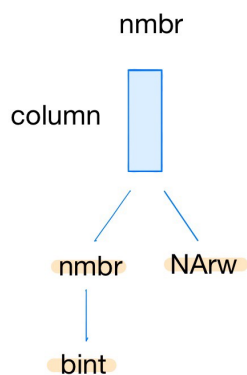

Returned  
columns:

- column\_nmbr
- column\_nmbr\_bint (set)
- column\_NArw

\* NArw based on  
NArw\_marker parameter  
\*\* bint based on  
binstransform parameter

bxcx

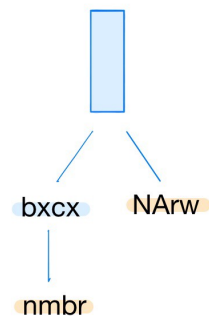

- column\_bxcx\_nmbr
- column\_NArw

log1

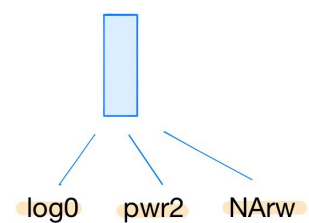

- column\_log0
- column\_10^# (set)
- column\_NArw

Here's an example of three simple sets of transformations which are intended for application to numerical source columns. Each transformation has a "root category" designator which is how the sets are assigned to distinct columns in the "assigncat"

dictionary passed to `automunge(.)`, as shown here the root categories are 'nmbr', 'bxcx', and 'log1'. Also demonstrated here are the order of application for transformations and the resulting returned columns for these root categories. Note that the transformations applied in derivation of a returned column are helpfully logged by the inclusion of suffix appenders affixed to the original column header, such as for example 'column\_nmbr' represents the source column 'column' with a 'nmbr' transformation applied. Or 'column\_nmbr\_bint' represents the source column 'column' with a 'nmbr' transform applied followed by the assembly of a 'bint' set of bins identifying the number of standard deviations from the mean for each entry.

The first of these sets, the 'nmbr' root category, is our default transform for numerical data under automation, and so gets a little special treatment by way of the `binstransform` parameter which allows a user to turn on or off the inclusion of a set of bins identifying numerical entries by the number of standard deviations from the mean of the set, which to be honest is sort of a relic from very early implementations and don't intend to offer this kind of option elsewhere going forward — the goal after all is universality and as they say in The Zen of Python “There should be one — and preferably only one — obvious way to do it.” The preferred way to specify custom transformations is by passing a `transformdict` to `automunge(.)` more on that to follow. The only other use in the library of a parameter to shape family trees is the 'NArw\_marker' parameter which turns on/off the inclusion of a NArw set on each internally defined root category, which identifies by boolean activations presence of entries which were subject to infill.

As a few more examples of root category returned sets, the 'bxcx' root category is intended for numerical sets in which a distribution may have fat-tailed characteristics, thus a Box-Cox power law transformation is applied to the data prior to the application of a z-score normalization (please consider this intended for advanced users). Note again that the transformation is performed on a basis of distribution properties found in the training data passed to `automunge(.)`, and then consistently applied to additional data, which we call such additional sets “test data”. Note also here that there is only one column returned in the 'bxcx' / 'nmbr' application (as 'column\_bxcx\_nmbr'), in the next slide we'll show how to specify. The 'log1' root category is another simple demonstration which receives a numerical set, and returns a column with a log transform applied, as well as a set of binned columns with activations identifying an entry's power of ten (e.g.

distinct column activations for source column values found in range 0.1–0.9, 1–9, 10–99, etc) by way of the ‘pwr2’ transform.

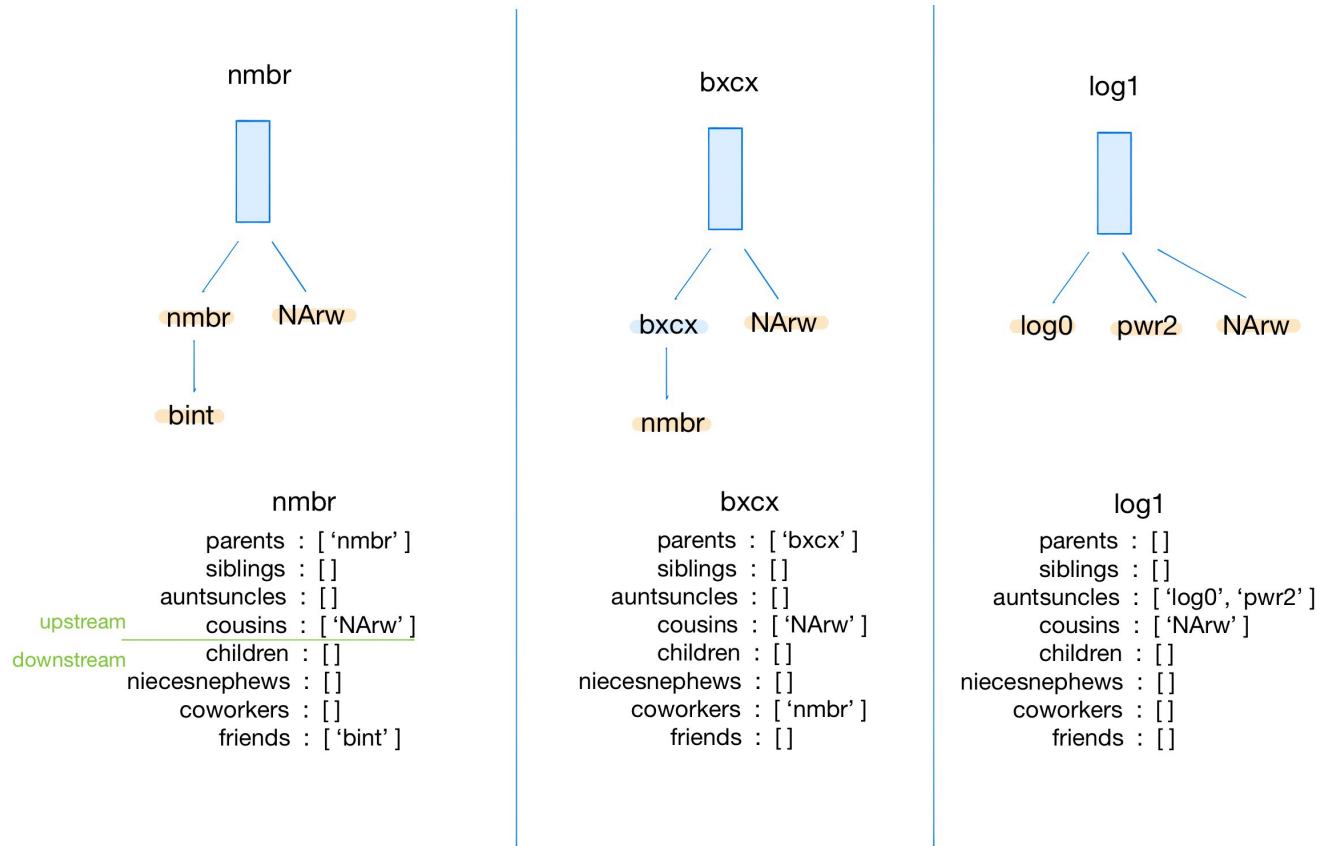

The specification of the family tree associated with a root category is performed in a data structure that we refer to as the “transformdict”. The transformdict has entries for each root category associated with family tree primitives of parents / siblings / auntsuncles / cousins // children / niecesnephews / coworkers / friends. The first four of these are “upstream” primitives which means they are only applied in a root category’s first generation of transformations. The second four are “downstream” primitives, and they are only inspected when the root category is found as an entry in a primitive with offspring.

(A slight bit of minutia, for advanced users: internally to codebase there is a distinction between “transformdict” without underscore and “transform\_dict” with underscore, which is simply that transformdict (without underscore) is the object passed to an automunge(.) call with user defined entries, and transform\_dict (with underscore) is

the resulting internal consolidated version including both user passed entries and internal library entries, sorry for the tangent (Medium needs to add support for footnotes). We use this kind of underscore distinction naming convention in a few places in codebase.)

To demonstrate for these simple examples, in the root category 'nmbr', the family tree has entries for upstream primitives of parents and cousins. For the parents primitive entries, family trees will be inspected to identify if there are any downstream primitive entries, such as for this case 'bint' is found as a downstream primitive entry for root category 'nmbr'. A root category, such as 'nmbr', can also be an entry to a primitive in its own family tree although that is not required. In the case of the 'bxcx' transform, the downstream primitive is a coworkers entry instead of friends, which differs in that it is a "replacement" primitive instead of a "supplement" primitive, which is why there is no 'column\_bxcx' column returned, just 'column\_bxcx\_nmbr'. For the 'log1' root category, we are only applying one generation of derivations so only upstream primitives are entered. Note that a user could still set downstream primitive entries here, but they would only be inspected and applied if 'log1' was found as an upstream primitive with offspring entry in some other root category's family tree.

| <b>primitive</b> | <b>upstream / downstream</b> | <b>applied to generation</b> | <b>column action</b> | <b>downstream offspring</b> |
|------------------|------------------------------|------------------------------|----------------------|-----------------------------|
| parents          | upstream                     | first                        | replace              | yes                         |
| siblings         | upstream                     | first                        | supplement           | yes                         |
| auntsuncles      | upstream                     | first                        | replace              | no                          |
| cousins          | upstream                     | first                        | supplement           | no                          |
| children         | downstream parents           | offspring                    | replace              | yes                         |
| niecesnephews    | downstream siblings          | offspring                    | supplement           | yes                         |
| coworkers        | downstream auntsuncles       | offspring                    | replace              | no                          |
| friends          | downstream cousins           | offspring                    | supplement           | no                          |

Let's take a closer look at the family tree primitives. The primitives can be distinguished by three properties:

1. **Generation:** upstream primitives are inspected and applied to the first generation associated with a root category, downstream primitives are only accessed if the root category was found as an entry in a primitive with offspring (whether in its own family tree or some other family tree), and thus may even potentially be applied for multiple generations after the first.
2. **Action:** there is a distinction between replacement and supplement. Replacement simply means that at completion of a generation, if a replacement primitive was found, the source column will be removed (which source column may be the returned column from a prior generation or for the first tier of transforms the original column of the passed data). Note that the presence of a replacement primitive in a generation overrides any supplement primitives, so even if a single replacement primitive is found along with supplement primitives the source column will still be removed.

3. Offspring: the downstream offspring refers to the distinction of whether an additional generation will be performed after completion of a primitive entry's transformation. Category entries to a primitive with offspring have their own family trees inspected for presence of downstream primitive entries.

Let's take a closer look at a few more advanced derivations to demonstrate.

Root Category:

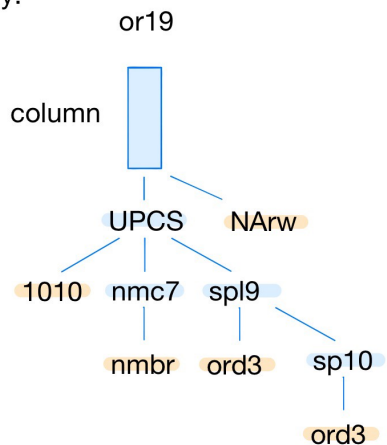

Returned columns:

- column\_UPCS\_1010 (set)
- column\_UPCS\_nmc7\_nmbr
- column\_UPCS\_spl9\_ord3
- column\_UPCS\_spl9\_sp10\_ord3
- column\_NArw

or20

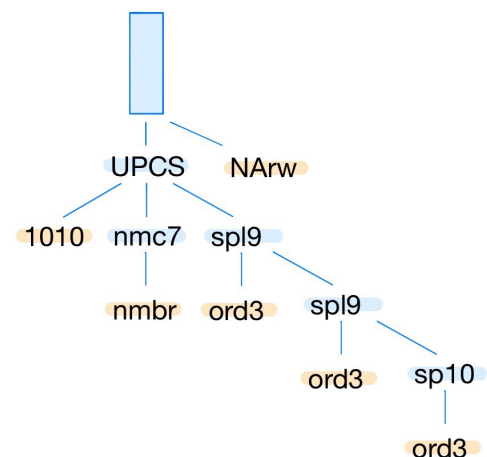

- column\_UPCS\_1010 (set)
- column\_UPCS\_nmc7\_nmbr
- column\_UPCS\_spl9\_ord3
- column\_UPCS\_spl9\_spl9\_ord3
- column\_UPCS\_spl9\_sp10\_ord3
- column\_NArw

The root categories 'or19' and 'or20' are intended to encode bounded categorical string sets of unknown composition (by bounded meaning with expectation of fixed range of potential values between train and test sets — there are variants in the library for other scenarios). These root categories are very illustrative of means for specifying multi-generation sets. Included in these derivations are the 'NArw' derivations discussed earlier identifying entries corresponding to infill based on missing or improperly formatted data in the source column. Upstream of all of the other transforms an 'UPCS' transform is applied which converts all categorical string entries to uppercase, based on the assumption that entries are intended as consistent between uppercase and lowercase

(for example resulting in consistent interpretation for string entries of usa, Usa, and USA). The '1010' transform is a binary categorical encoding, kind of related to one-hot encoding but in which multiple columns may have simultaneous activations, thus allowing a more efficient memory bandwidth for encoding categorical sets with large range of values (sort of a compromise between one-hot encoding and ordinal encoding). The 'nmc7', 'spl9', and 'sp10' categories are part of our "string parsing" family of transformations which evaluate sets of string compositions to identify things like presence of numbers embedded in string entries or character overlaps between entries.

Going into more detail, the 'nmc7' transform parses the categorical string entries in the training set to identify any numerical string inclusions, and returns those numbers as a dedicated column of floats. Note that the 'nmc7' transform differs from 'nmr7' for instance in that the inclusion of comma characters are allowed in the numerical portion of the strings. Note that if multiple numerical entries are present in the string the longest grouping will be returned. As demonstrated here, the extraction of numerical entries can then be normalized with a z-score normalization via the 'nmbr' transform. The 'spl9' transform is really neat and I'm proud of how it turned out. It's a means to parse training set categorical string entries to identify cases where the string compositions may have character overlaps, and if found the longer versions with identified overlaps are replaced with the shorter overlap. For example, a set with entries of ['North Florida', 'Central Florida', 'South Florida', 'The Keys'] would be consolidated to and returned as ['th Florida', 'Central Florida', 'th Florida', 'The Keys'], and then with a second application would be further consolidated and returned as [' Florida', ' Florida', ' Florida', 'The Keys']. As demonstrated here, the application of 'spl9' can thus be run in multiple iterations to progressively identify shorter length character overlaps, each of which returned sets may then be further encoded with 'ord3' which is an ordinal encoding sorted by frequency, such as for our example would return [0, 0, 0, 1] which is then directly digestible by machine learning algorithms. There is a small distinction between 'spl9' and 'sp10' in which entries that are not consolidated are replaced with a 0 to avoid unnecessary redundancy between earlier returned 'spl9' outputs and 'sp10' outputs, thus 'sp10' should only be applied to the final tier of string parsing applications.

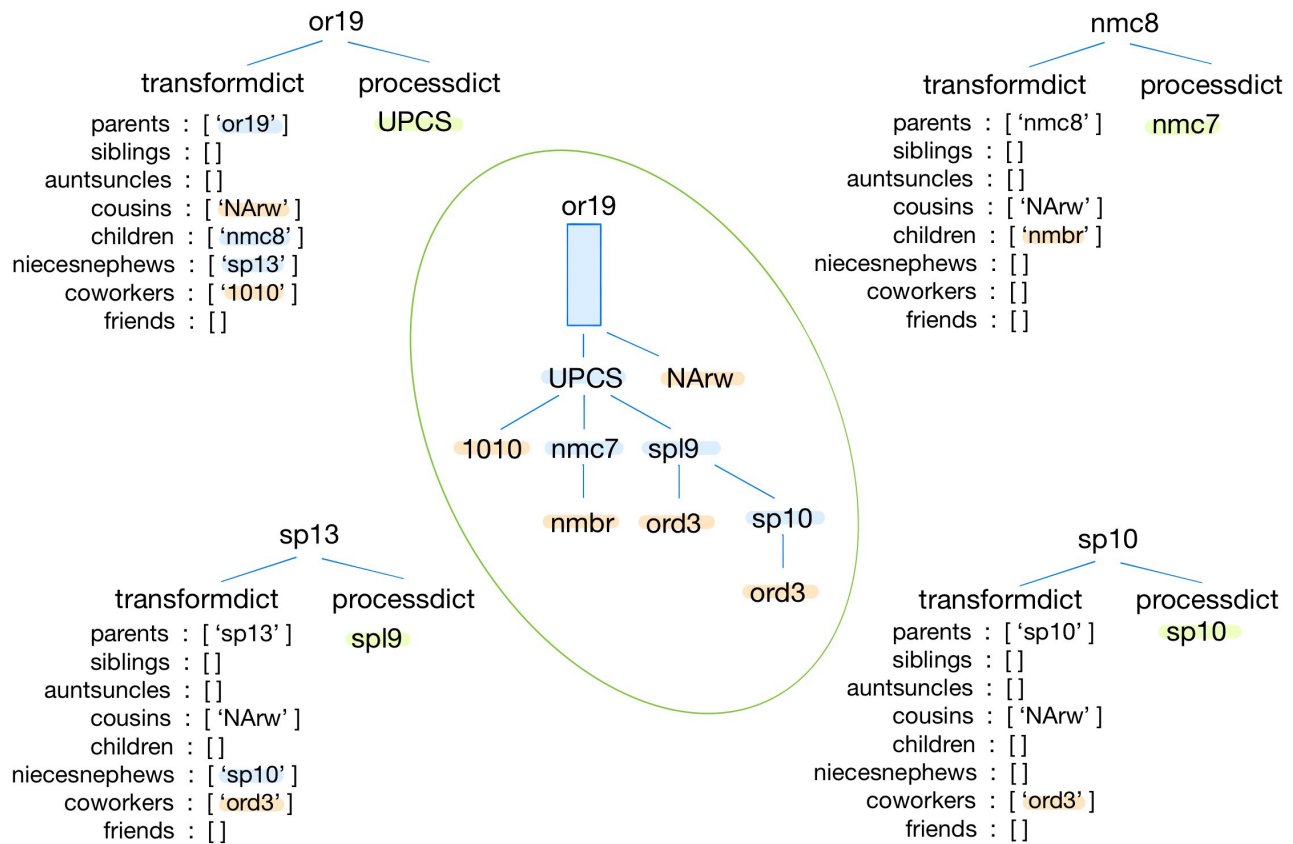

The specification of the ‘or19’ transformdict entries are now demonstrated, and we’ll see a little more complexity than our last demonstration, partly as we are showing additional detail of how a transform category is matched to a transformation function by the corresponding function entries in the “processdict”. A processdict contains a few entries associated with each category such as to distinguish expected data properties for purposes of deriving NArw entries and ML infill application (not shown), here we’re just focusing on the specification of a processdict transformation function. A transformation function may be associated with multiple transformation categories used as entries to family tree primitives, while each transformation category may only be associated with a single transformation function. Thus we’re able to specify multiple configurations of unique branches downstream of a common transformation function in different family trees. For the example of branches used to derive the specific returned column ‘column\_UPCS\_spl9\_sp10\_ord3’, a source column is assigned to the root category ‘or19’, and so upstream primitive entries are applied for ‘or19’ and ‘NArw’, here we’ll just focus on one specific path for demonstration, the entry to the parent primitive is ‘or19’, so the transformation function found in the ‘or19’ processdict entry is applied, which is ‘UPCS’. Because parents is a replacement primitive, the source column is not returned. And since parents is a primitive with offspring, the ‘or19’ transformdict is inspected for

downstream primitive entries, here the one we're interested in is the niecesnephews entry of 'sp13', which applies a 'spl9' transformation function based on the 'sp13' processdict entry. Since niecesnephews has downstream offspring, the 'sp13' family tree is inspected for downstream primitive entries, here we're interested in 'sp10', which applies a 'sp10' transform based on the 'sp10' processdict. Since 'sp10' was accessed as a niecesnephews entry in the 'sp13' transformdict, we'll look again for offspring, now looking at the downstream primitives in the 'sp10' transformdict, where we'll find a coworkers primitive entry of 'ord3', which replaces the source column and returns an 'ord3' transformation based on the (not shown) 'ord3' processdict entry.

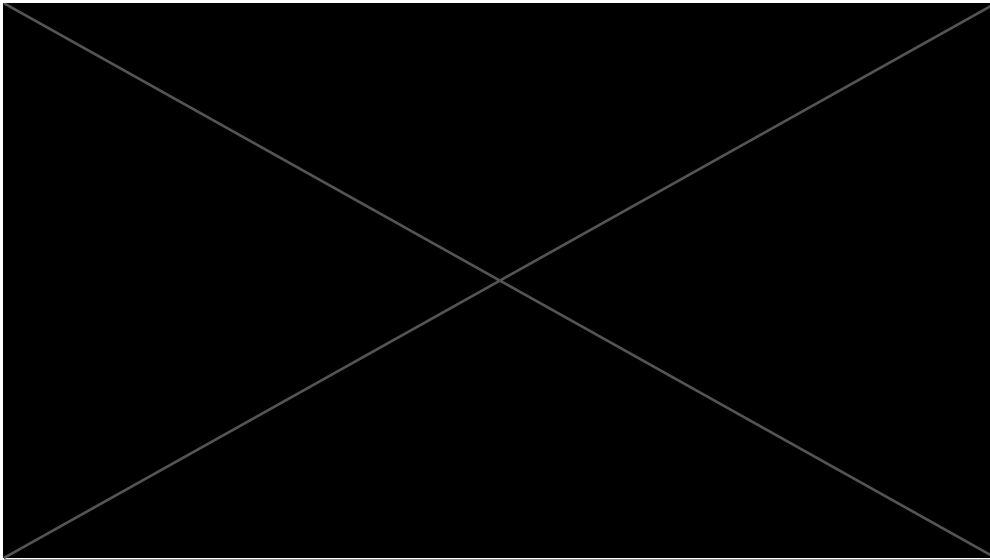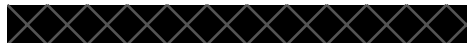

I have demonstrated here some of the minutia of complexity for advanced users of the Automunge library, but these considerations need not be taken into account for mainstream use. The design philosophy is all of these methods here are abstracted, and



a user need not even think about the matter unless one wishes to pursue more advanced methods for passing custom sets of transformations.

I'm afraid that I don't have a lot to offer to the Coronavirus discussion. I have high faith in our government leadership to handle this matter appropriately and intend to defer to their decisions and communications on the matter until such time as I may find myself in position to offer unique contribution.

I would like to offer to any data scientists or practitioners that are looking to work towards the solution by way of evaluating tabular data sets to perform machine learning evaluations that the Automunge library is very useful for this purpose and I would be happy to offer an introduction and guidance. Saying a prayer for the safety and health of our global community. We are all in this together. The dawn will come.

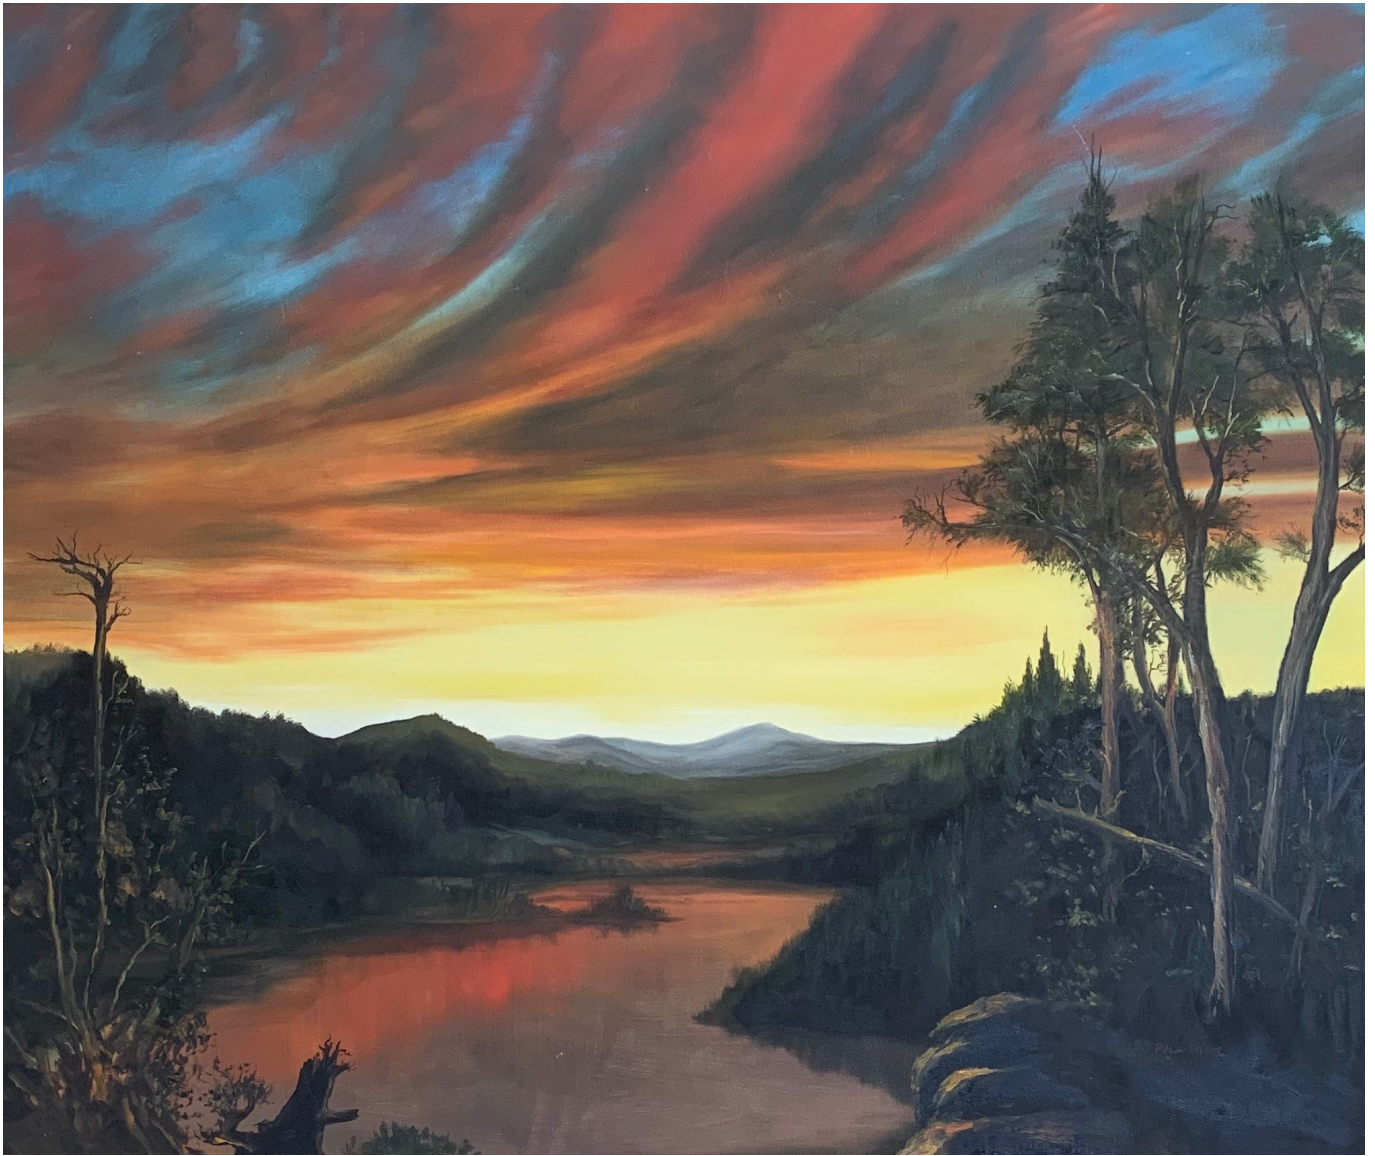

*\* patent pending*
