# Supplementary material
Source: ML conference proceedings conference paper supplement (https://openreview.net/forum?id=o2tx_m7hK3t)
Supplement: supplementary_material [file attachment]

Please note that additional tutorial notebooks are available in the Tutorials folder found in GitHub repository.
