# Supplementary material
Source: ML conference proceedings conference paper supplement (https://openreview.net/forum?id=o2tx_m7hK3t)
Supplement: supplementary_material [file attachment]

The Appendix is primarily intended as a resource for more detail on implementing a few of the features discussed in the paper. It also includes a Broader Impacts discussion as Appendix C.

There were several cited papers with shared author(s), anonymized preprints are provided for your reference. (It would be difficult to share these otherwise while retaining anonymity due to the publishing venue etc.)

We've included a folder with a few Jupyter notebook demonstrations that follow along code excerpts from the paper, experiments, appendix, as well as demonstrating some of our validation tests performed prior to rollouts. The Github repository also contains several helpful tutorial notebooks in the Tutorials folder if you would like to see various aspects of the library in action.

Full documentation for the library is available in the README.md file found in the GitHub repository. It is much easier to navigate online using hyperlinks. If you want to view particular sections of the read me, here is the general structure so that you can navigate between these headers using a control F search.

---

Introduction

Install, Initialize, and Basics

automunge(.)

automunge(.) returned sets

automunge(.) passed parameters

postmunge(.)

postmunge(.) returned sets

postmunge(.) passed parameters

Default Transformations

Library of Transformations

Custom Transformation Functions

Conclusion

---
